# Supplementary material for: ReliefSeq: A Gene-Wise Adaptive-K Nearest-Neighbor Feature Selection Tool for Finding Gene-Gene Interactions and Main Effects in mRNA-Seq Gene Expression Data
Source: PLoS One. 2013 Dec 10;8(12):e81527. doi: 10.1371/journal.pone.0081527 (PMC3858248; doi:10.1371/journal.pone.0081527)
Supplement: Table S1 — Additional statistics on variation for the simulation results in Figure 5. The first column describes the effect of the gene in the simulated model: the fold change and negative binomial parameters. The remaining columns measure the mean, lower 5th and upper 95th percentile of the rank for the corresponding methods. The methods compared are Reliefseq with optimized k nearest neighbors and Relief-F with k = 10. (XLS) [file pone.0081527.s001.xls]

## Sheet: supplemental_table_1_mutheta.ta
Supporting Table S1
fc|theta|avgmu	Reliefseq kopt Avg	Reliefseq kopt Lower	Reliefseq kopt Upper	egdeR Avg	edgeR Lower	edgeR Upper	DEseq Avg	DEseq Lower	DEseq Upper
2|16.804|563	4.358	4.11321	4.60279	10.326	9.92455	10.7274	6.7	6.45878	6.94122
2|15.345|14829	5.065	4.79179	5.33821	9.615	9.22675	10.0033	6.58	6.34564	6.81436
2|15.345|7509	4.894	4.63654	5.15146	9.714	9.31523	10.1128	5.82	5.58332	6.05668
2|15.345|1498	5.022	4.76588	5.27812	9.655	9.26443	10.0456	6.25	6.01643	6.48357
2|15.345|1125	5.485	5.21057	5.75943	10.042	9.64465	10.4394	7.28	6.99916	7.56084
2|15.345|750	5.296	5.02265	5.56935	9.94	9.53286	10.3471	7.02	6.72149	7.31851
2|15.345|750	5.137	4.87324	5.40076	10.165	9.7592	10.5708	6.48	6.20703	6.75297
2|12.119|7514	8.348	7.96763	8.72837	10.254	9.79161	10.7164	8.3	7.94891	8.65109
2|11.309|3770	9.278	8.84602	9.70998	10.145	9.67547	10.6145	8.32	7.94418	8.69582
2|11.309|375	9.634	9.20928	10.0587	10.823	10.3339	11.3121	9.34	8.95185	9.72815
2|11.309|150	10.198	9.77547	10.6205	12.417	11.9074	12.9266	10.56	10.1861	10.9339
2|7.595|300	18.569	17.7261	19.4119	12.21	11.5928	12.8272	15.18	14.6624	15.6976
2|6.611|75	23.613	22.5125	24.7135	14.774	14.065	15.483	18.83	18.1261	19.5339
2|6.611|38	28.681	25.1989	32.1631	20.69	18.2644	23.1156	23.31	22.5464	24.0736
2|5.829|30	41.233	37.0201	45.4459	24.354	22.6489	26.0591	43.72	33.5705	53.8695
2|5.829|15	54.946	48.3681	61.5239	36.068	33.2565	38.8795	39.22	36.4789	41.9611
2|5.603|75	35.397	31.624	39.17	16.39	14.8733	17.9067	24.96	24.1877	25.7323
2|5.603|15	62.844	53.9898	71.6982	36.101	32.5089	39.6931	34.76	33.5017	36.0183
2|4.83|150	45.106	40.2373	49.9747	15.372	14.3685	16.3755	40.24	36.3394	44.1406
2|4.508|8	155.265	128.593	181.937	113.53	75.1232	151.937	57.41	53.6822	61.1378
2|4.36|8	162.643	139.573	185.713	91.98	75.1156	108.844	78.04	68.374	87.706
2|4.36|4	405.287	339.376	471.198	406.808	325.182	488.434	550.26	447.317	653.203
2|2.972|2	1065.87	950.069	1181.67	1683.5	1500.39	1866.61	1879.44	1712.4	2046.48
2|2.679|3	636.6	561.942	711.258	585.601	483.258	687.944	708.89	623.818	793.962
1.68|16.804|797	12.009	11.5334	12.4846	32.603	31.6653	33.5407	21.43	20.9758	21.8842
1.68|15.345|3996	13.874	12.9092	14.8388	31.875	30.7389	33.0111	21.29	20.6868	21.8932
1.68|15.345|1340	14.007	13.4682	14.5458	31.532	30.6396	32.4244	21.44	20.9144	21.9656
1.68|14.107|599	15.3	14.6499	15.9501	32.49	30.9811	33.9989	19.78	19.3247	20.2353
1.68|13.043|670	17.303	16.6323	17.9737	32.419	31.4104	33.4276	21.64	21.1495	22.1305
1.68|12.119|13303	19.101	18.1932	20.0088	32.064	30.8312	33.2968	21.16	20.5523	21.7677
1.68|12.119|1006	19.043	18.2434	19.8426	32.244	31.0595	33.4285	22.02	21.3961	22.6439
1.68|12.119|399	19.073	18.2911	19.8549	32.848	31.793	33.903	20.9	20.3973	21.4027
1.68|9.956|6723	26.499	24.9038	28.0942	32.81	31.4771	34.1429	22.38	21.8528	22.9072
1.68|9.956|159	30.27	28.1951	32.3449	38.346	36.4653	40.2267	28.04	26.6736	29.4064
1.68|8.406|80	45.16	40.5556	49.7644	44.31	40.3717	48.2483	30.52	29.5197	31.5203
1.68|7.24|268	71.124	57.3918	84.8562	51.646	41.3934	61.8986	98.51	65.3494	131.671
1.68|7.24|40	81.67	69.4876	93.8524	69.454	55.674	83.234	114.36	77.1182	151.602
1.68|6.331|67	85.071	74.8681	95.2739	50.653	45.8956	55.4104	67.14	59.8341	74.4459
1.68|6.071|134	98.41	77.2946	119.525	57.033	42.4781	71.5879	127.49	88.4159	166.564
1.68|5.603|27	191.63	158.428	224.832	116.362	93.0386	139.685	158.74	134.138	183.342
1.68|4.83|13	330.265	282.307	378.223	206.513	164.797	248.229	134.59	124.698	144.482
1.68|4.22|8029	236.344	204.309	268.379	76.336	54.5489	98.1231	142.72	122.611	162.829
1.68|4.087|4	886.398	791.408	981.388	1059.8	912.293	1207.32	978.73	851.719	1105.74
1.68|3.511|8	728.719	642.842	814.596	571.529	472.062	670.996	939.78	833.849	1045.71
1.68|3.412|16	563.675	493.085	634.265	338.878	259.234	418.522	614.16	509.402	718.918
1.68|3.053|3	1353.48	1229.05	1477.91	1994.08	1783.81	2204.34	2147.82	1947.23	2348.41
1.68|2.895|2	1684.88	1535.55	1834.21	3014.76	2759.94	3269.59	2749.26	2504.14	2994.38
1.68|2.679|7	1056.14	948.348	1163.94	835.537	705.308	965.766	1293.71	1151.38	1436.04
1.41|16.804|1206	44.609	40.1157	49.1023	148.05	135.098	161.002	79.86	71.2607	88.4593
1.41|16.804|604	52.316	45.4253	59.2067	154.43	140.912	167.948	85.76	75.5032	96.0168
1.41|15.345|6019	58.26	47.7523	68.7677	160.759	144.317	177.201	67.79	63.2403	72.3397
1.41|15.345|4242	55.666	48.7375	62.5945	161.269	145.675	176.863	65.21	60.8084	69.6116
1.41|15.345|640	58.291	52.0985	64.4835	173.989	157.538	190.44	76.11	71.3613	80.8587
1.41|14.107|427	72.351	60.3245	84.3775	172.38	154.679	190.081	78.07	71.1041	85.0359
1.41|12.119|8548	121.7	100.527	142.873	216.837	192.071	241.603	116.37	100.898	131.842
1.41|11.309|12247	129.954	108.184	151.724	194.411	168.656	220.166	60.64	56.612	64.668
1.41|9.956|241	260.985	213.194	308.776	324.124	258.293	389.955	162	137.957	186.043
1.41|9.956|171	213.623	182.197	245.049	273.055	233.598	312.512	180.51	154.376	206.644
1.41|7.982|121	357.617	306.726	408.508	317.94	269.839	366.041	257.48	212.287	302.673
1.41|7.982|43	422.731	365.96	479.502	466.061	392.411	539.711	291.68	231.614	351.746
1.41|7.595|85	410.017	353.406	466.628	391.878	328.172	455.584	444.17	368.039	520.301
1.41|6.071|854	564.254	494.219	634.289	504.186	407.25	601.122	816.12	673.643	958.597
1.41|5.829|24	784.783	698.54	871.026	815.093	698.778	931.408	955.79	819.395	1092.19
1.41|5.603|60	747.526	659.99	835.062	605.02	505.487	704.553	777.41	675.667	879.153
1.41|3.96|12	1524.22	1387.17	1661.27	1570.81	1381.52	1760.11	2296.72	2063.66	2529.78
1.41|3.725|905	1151	1038.34	1263.66	799.132	659.886	938.378	963.82	845.915	1081.73
1.41|3.511|2	2306.71	2137.32	2476.09	4368.46	4072.47	4664.44	4379.61	4104.21	4655.01
1.41|2.895|4	2180.2	2019.96	2340.45	3168.68	2905.92	3431.44	4004.82	3726.62	4283.02
1.41|2.748|2	2560.78	2380.88	2740.68	4869.38	4569.05	5169.71	5768.52	5442.93	6094.11
1.41|2.612|17	1858.81	1719.37	1998.25	1640.56	1441.45	1839.66	2111.39	1917.57	2305.21
1.41|2.312|6	2399.4	2232.65	2566.15	2975.95	2709.88	3242.01	4281.76	3991.51	4572.01
1.41|1.583|9	2542.79	2380.73	2704.86	2510.68	2263.8	2757.55	4343.79	4065.95	4621.63
1.19|16.804|690	1035.66	934.75	1136.58	2681.86	2487.62	2876.11	2186.23	1989.25	2383.21
1.19|15.345|9334	1249.53	1126.7	1372.37	2571.86	2384.63	2759.09	1890.88	1703.55	2078.21
1.19|14.107|10869	1140.21	1028.71	1251.72	2330.8	2149.41	2512.19	1852.14	1681.85	2022.43
1.19|13.043|5441	1434.97	1306.97	1562.97	2805.05	2594.23	3015.87	2114.93	1933.87	2295.99
1.19|13.043|1094	1335.69	1212.76	1458.62	2692.32	2481.11	2903.53	2162.05	1967.17	2356.93
1.19|12.119|4628	1530.15	1397.69	1662.61	2914.49	2690.51	3138.48	2243.02	2028.76	2457.28
1.19|12.119|821	1442.82	1312.95	1572.7	2815.51	2600.44	3030.57	2969.29	2714.31	3224.27
1.19|12.119|547	1381.45	1258.02	1504.89	2742.91	2536.52	2949.3	2540.77	2334.41	2747.13
1.19|11.309|920	1651.62	1507.18	1796.05	2964.45	2734.24	3194.66	2494.82	2261.87	2727.77
1.19|11.309|184	1666.34	1526.68	1806	3107.24	2874.73	3339.74	2474.09	2248.41	2699.77
1.19|10.593|219	1826.4	1677.13	1975.67	3288.97	3048.41	3529.53	3379.89	3130.2	3629.58
1.19|8.872|460	2055.48	1899.24	2211.72	3332.4	3077.83	3586.96	3671.98	3418.62	3925.34
1.19|8.872|92	2022.01	1867.69	2176.33	3387.11	3134.9	3639.31	3302.39	3051.63	3553.15
1.19|6.913|55	2345.11	2189.43	2500.79	3710.39	3441.54	3979.25	3626.13	3351.93	3900.33
1.19|6.071|109	2470.45	2305.57	2635.33	3556.76	3286.26	3827.26	3997.06	3716.21	4277.91
1.19|5.603|46	2779.32	2606.05	2952.6	3997.39	3715.04	4279.75	4411.69	4128.11	4695.27
1.19|5.603|22	2702.09	2524.8	2879.38	4337.03	4037.62	4636.43	3900.92	3618.89	4182.95
1.19|5.603|18	2873.94	2695.08	3052.81	4479.33	4185.24	4773.43	4612.03	4336.7	4887.36
1.19|3.96|11	3021.79	2839.85	3203.73	4845	4536.84	5153.17	6295.72	5978.24	6613.2
1.19|3.316|5	3128.43	2956.44	3300.41	5979.45	5653.29	6305.6	6874.15	6549.79	7198.51
1.19|3.316|2	3222.2	3028.53	3415.87	6989.24	6657.97	7320.52	7239.45	6899.32	7579.58
1.19|3.225|2	3285.67	3090.86	3480.49	7582.23	7250.93	7913.53	8323.47	7980.68	8666.26
1.19|2.82|9	3289.82	3100.28	3479.35	5107.75	4788.24	5427.25	5794.2	5485.03	6103.37
1.19|2.82|5	3341.7	3155.93	3527.47	5690.8	5372.47	6009.13	6598.57	6273.09	6924.05
